# Supplementary material
Source: PubMed Central journal article supplement (PMC2669382)
Supplement: 0809317106_0809317106SI.pdf [file 0809317106_0809317106SI.pdf]

# Supporting Information

Mars et al. 10.1073/pnas.0809317106

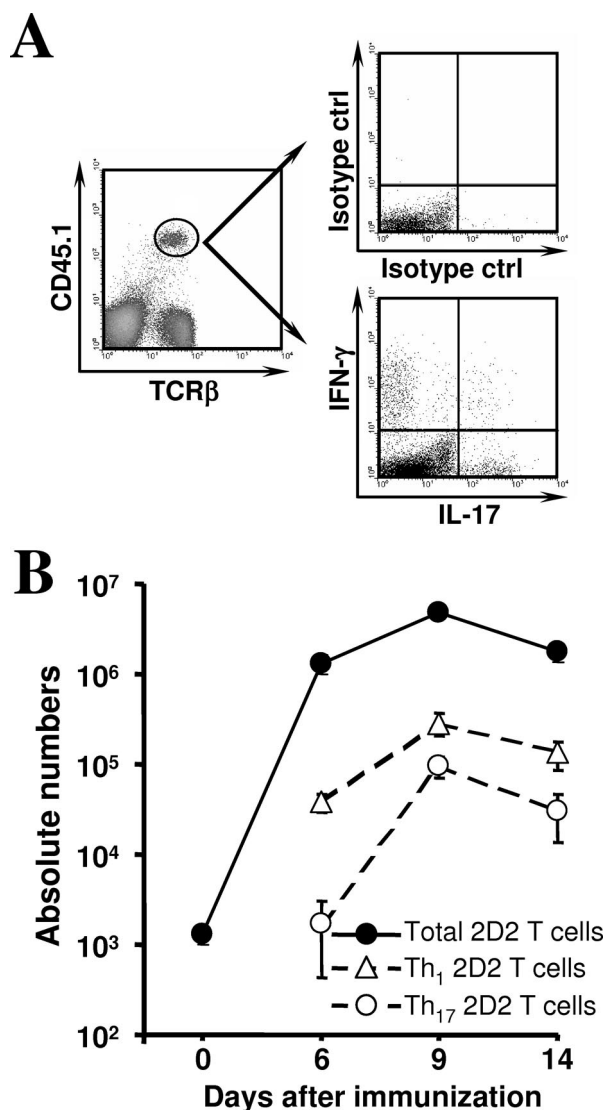

**Fig. S1.** Kinetics of MOG-specific Th<sub>1</sub> and Th<sub>17</sub> cell development in the spleen. C57BL/6 mice received 10<sup>5</sup> congenic CD62L<sup>+</sup>CD25<sup>-</sup> 2D2 CD4<sup>+</sup> T cells and were immunized 24 h later with MOG<sub>35–55</sub> in the presence of pertussis toxin. (A) The intracellular IFN- $\gamma$  and IL-17 content was assessed on gated congenic 2D2 cells. (B) The number of congenic 2D2, Th<sub>1</sub> 2D2, and Th<sub>17</sub> 2D2 cells was determined on the day of immunization (day 0;  $n = 6$ ), and 6 ( $n = 4$ ), 9 ( $n = 8$ ), and 14 ( $n = 8$ ) days after immunization. The number of Th<sub>17</sub> 2D2 cells was significantly inferior to Th<sub>1</sub> 2D2 cells at days 6, 9, and 14 after immunization.

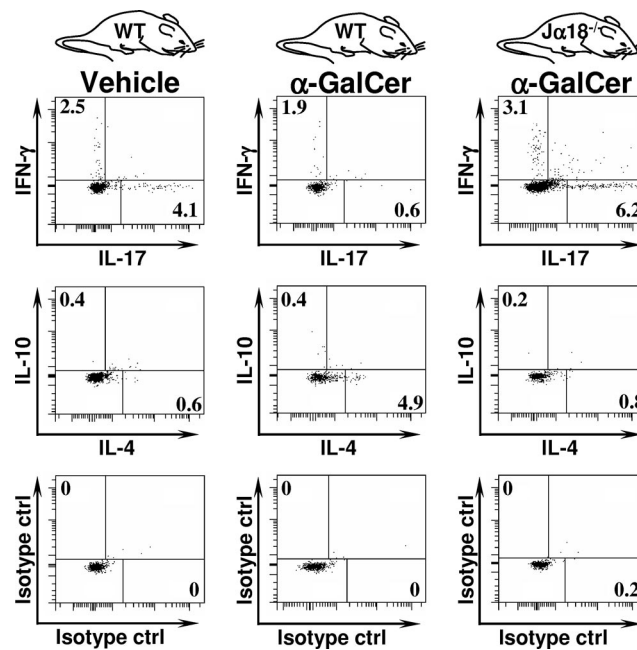

**Fig. S2.** Detection of MOG-specific Th<sub>1</sub>, Th<sub>17</sub>, Th<sub>2</sub>, and Tr<sub>1</sub> 2D2 cells after activation of iNKT cells with  $\alpha$ -GalCer. MOG-specific T-cell differentiation was assessed in cells from the draining LNs of immunized C57BL/6 (WT) and  $J\alpha 18^{-/-}$  mice after transfer of  $10^5$  congenic CD62L<sup>+</sup>CD25<sup>-</sup> 2D2 CD4<sup>+</sup> cells. Nine days after immunization, the intracellular expression of IFN- $\gamma$ , IL-17 (Top) and IL-4, IL-10 (Middle) was assessed in CD45.1<sup>+</sup>TCR $\alpha$ 3.2<sup>+</sup> CD4<sup>+</sup> T cells after treatment with either  $\alpha$ -GalCer (WT,  $n = 11$ ;  $J\alpha 18^{-/-}$ ,  $n = 4$ ) or vehicle (WT,  $n = 11$ ;  $J\alpha 18^{-/-}$ ,  $n = 4$ ). Isotype-matched mAbs with irrelevant specificity were used as controls (Bottom). All mice were analyzed individually in 3 separate experiments (WT) or a single experiment ( $J\alpha 18^{-/-}$ ).



**Table S1. Clinical severity of EAE**

| Treatment        | Neutralization      | <i>n</i> | Incidence,<br>% | Mean day of<br>onset (SEM) | Mean cumulative<br>severity (SEM) | Mortality,<br>% |
|------------------|---------------------|----------|-----------------|----------------------------|-----------------------------------|-----------------|
| Vehicle          | None                | 4        | 100             | 13 ( $\pm 0.5$ )           | 66 ( $\pm 32$ )                   | 25              |
| Vehicle          | IL4 + IL10R         | 4        | 100             | 14 ( $\pm 1.0$ )           | 145 ( $\pm 4$ )                   | 100             |
| Vehicle          | IFN-g               | 4        | 75              | 12 ( $\pm 1.2$ )           | 112 ( $\pm 37$ )                  | 75              |
| Vehicle          | IFN-g + IL4 + IL10R | 3        | 100             | 15 ( $\pm 0.3$ )*          | 142 ( $\pm 4$ )                   | 100             |
| $\alpha$ -GalCer | None                | 4        | 0               |                            | 0 ( $\pm 0$ )                     | 0               |
| $\alpha$ -GalCer | IL4 + IL10R         | 4        | 100             | 14 ( $\pm 1.6$ )**         | 147 ( $\pm 7$ )*                  | 100             |
| $\alpha$ -GalCer | IFN-g               | 4        | 75              | 16 ( $\pm 1.7$ )*          | 91 ( $\pm 33$ )                   | 50              |
| $\alpha$ -GalCer | IFN-g + IL4 + IL10R | 4        | 75              | 15 ( $\pm 2.0$ )*          | 107 ( $\pm 36$ )                  | 75              |

Statistical significance was tested by comparing the cytokine-neutralized mice with their respective nonneutralized vehicle or  $\alpha$ -GalCer-treated counterpart (\*,  $P < 0.05$ ; \*\*,  $P < 0.01$ ).
